# 1 **A rapid, sensitive, scalable method for** 2 **Precision Run-On sequencing (PRO-seq)**

3  
4 Julius Judd<sup>1\*</sup>, Luke A. Wojenski<sup>2\*</sup>, Lauren M. Wainman<sup>2\*</sup>, Nathaniel D. Tippens<sup>1</sup>, Edward J.  
5 Rice<sup>3</sup>, Alexis Dziubek<sup>1,2</sup>, Geno J. Villafano<sup>2</sup>, Erin M. Wissink<sup>1</sup>, Philip Versluis<sup>1</sup>, Lina Bagepalli<sup>1</sup>,  
6 Sagar R. Shah<sup>1</sup>, Dig B. Mahat<sup>1#a</sup>, Jacob M. Tome<sup>1#b</sup>, Charles G. Danko<sup>3,4</sup>, John T. Lis<sup>1†</sup>,  
7 Leighton J. Core<sup>2†</sup>

8  
9 \*Equal contribution

10 <sup>1</sup>Department of Molecular Biology and Genetics, Cornell University, Ithaca, NY 14853, USA

11 <sup>2</sup>Department of Molecular and Cell Biology, Institute of Systems Genomics, University of  
12 Connecticut, Storrs, CT 06269, USA

13 <sup>3</sup>Baker Institute for Animal Health, College of Veterinary Medicine, Cornell University, Ithaca,  
14 NY 14853, USA

15 <sup>4</sup>Department of Biomedical Sciences, College of Veterinary Medicine, Cornell University,  
16 Ithaca, NY 14853, USA

17 #aPresent address: Koch Institute for Integrative Cancer Research, Massachusetts Institute of  
18 Technology, Cambridge, MA 02139, USA

19 #bPresent address: Department of Genome Sciences, University of Washington, Seattle, WA,  
20 USA

21 †Correspondence to: [leighton.core@uconn.edu](mailto:leighton.core@uconn.edu) or [johnlis@cornell.edu](mailto:johnlis@cornell.edu)

22

23 **Abstract**

24

25 Tracking active transcription with the nuclear run-on (NRO) assays has been instrumental in  
26 uncovering mechanisms of gene regulation. The coupling of NROs with high-throughput  
27 sequencing has facilitated the discovery of previously unannotated or undetectable RNA classes  
28 genome-wide. Precision run-on sequencing (PRO-seq) is a run-on variant that maps polymerase  
29 active sites with nucleotide or near-nucleotide resolution. One main drawback to this and many  
30 other nascent RNA detection methods is the somewhat intimidating multi-day workflow  
31 associated with creating the libraries suitable for high-throughput sequencing. Here, we present  
32 an improved PRO-seq protocol where many of the enzymatic steps are carried out while the  
33 biotinylated NRO RNA remains bound to streptavidin-coated magnetic beads. These  
34 adaptations reduce time, sample loss and RNA degradation, and we demonstrate that the  
35 resulting libraries are of the same quality as libraries generated using the original published  
36 protocol. The assay is also more sensitive which permits reproducible, high-quality libraries from  
37  $10^4$ – $10^5$  cells instead of  $10^6$ – $10^7$ . Altogether, the improved protocol is more tractable allows for  
38 nascent RNA profiling from small samples, such as rare samples or FACS sorted cell  
39 populations.

40

41 **Keywords:** Nuclear run-on, Nascent RNA, Transcription, RNA polymerase, non-coding RNA

42

## 43 1. Introduction

44  
45 Next-generation sequencing technologies are now  
46 routinely used to measure gene expression levels in a  
47 highly sensitive and comprehensive fashion. RNA-seq  
48 facilitate simultaneous detection, identification, and  
49 annotation of many classes of cellular RNAs. Traditionally,  
50 however, this technology primarily measures steady-state  
51 RNA levels, which are a consequence of equilibrium  
52 between RNA transcription, processing, and degradation.  
53 As a result, many unstable RNAs, particularly eRNA and  
54 some lncRNAs, are not easily detected with these  
55 approaches. Alternatively, ChIP-seq allows for identification  
56 and quantification of RNA polymerase II (Pol II) associated  
57 DNA. This produces a genome-wide map of both  
58 transcriptionally active and inactive Pol II without strand  
59 specificity, thus the direction and transcriptional status of  
60 the polymerase are ambiguous. Furthermore, the relatively  
61 high background in ChIP-seq as compared to RNA-based  
62 methods obfuscates comprehensive transcript and regulatory element detection. To address  
63 these shortcomings, various methods of measuring transcription by genome-wide profiling of  
64 nascent RNA have now been developed including GRO-seq (Core et al., 2008), PRO-seq (Kwak  
65 et al., 2013), NET-seq (Churchman and Weissman, 2011), and TT-seq (Schwalb et al., 2016).  
66 Characteristics of these assays are reviewed in (Wissink et al., 2019).

67  
68 GRO-seq and PRO-seq are modern, genome-wide improvements of the nuclear run-on  
69 assay, which has been in use for approximately 60 years (Weiss and Gladstone, 1959). Over  
70 the years, run-on assays have been instrumental in the study or discovery of various forms of  
71 gene regulation including, steady state transcription levels and mRNA turnover (Derman et al.,  
72 1981; Powell et al., 1984), promoter-proximal pausing (Gariglio et al., 1981; Rougvie and Lis,  
73 1988), transcription rates (Bentley and Groudine, 1986; Hirayoshi and Lis, 1999; O'Brien and  
74 Lis, 1993), and 3'-end processing and termination (Birse et al., 1997). The nuclear run-on  
75 reaction works by adding labelled nucleotides to polymerases that are halted in the act of  
76 transcription yet still transcriptionally competent. The polymerases incorporate the exogenous  
77 NTPs and the labelled nascent transcripts can then be detected and quantified. In 2004, the  
78 assay was adapted for macro-array by spotting probes of whole yeast genes on to nylon  
79 membranes (García-Martínez et al., 2004). In 2008, the nuclear run-on assay was expanded to  
80 cover the entire genome in global run-on and sequencing (GRO-seq) (Core et al., 2008). GRO-

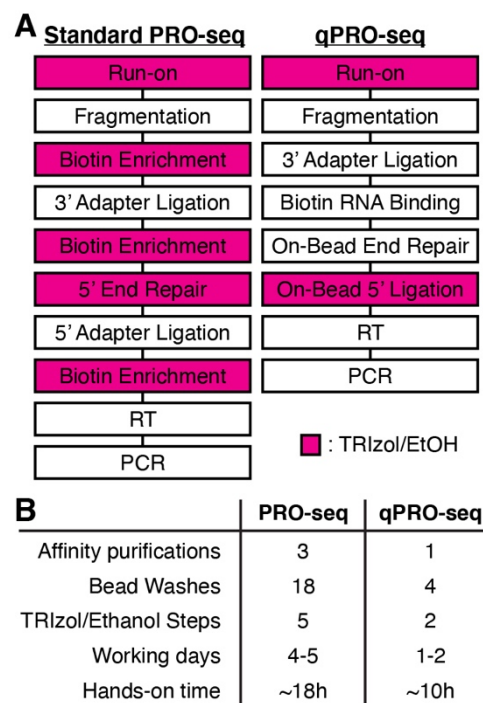

**Figure 1: A rapid and efficient PRO-seq protocol. (A)** Overview of changes to the PRO-seq protocol implemented in qPRO-seq. **(B)** Comparison of steps and time required to complete each protocol.

81 seq employs a BrU-containing run-on  
 82 reaction, enabling affinity purification  
 83 and subsequent high-throughput  
 84 sequencing of the entire nascent  
 85 transcriptome. This allows sensitive  
 86 and strand specific measurement of  
 87 all transcriptionally engaged RNA  
 88 polymerases, but resolution is limited  
 89 because run-on length can only be  
 90 loosely controlled via limiting  
 91 nucleotide titration.

92  
 93 To address this shortcoming,  
 94 precision nuclear run-on and  
 95 sequencing (PRO-seq) uses a similar  
 96 run-on and sequencing strategy but  
 97 substitutes bulky, biotin-tagged NTPs  
 98 instead of BrU (Kwak et al., 2013;  
 99 Mahat et al., 2016). Biotin effectively  
 100 halts eukaryotic RNA polymerases  
 101 after incorporation of a single NTP,  
 102 which enables genome-scale profiling  
 103 of transcriptionally engaged  
 104 polymerases with base-pair precision.  
 105 PRO-seq and the associated  
 106 technology ChRO-seq (Chu et al.,  
 107 2018; Kwak, 2013) have now been  
 108 used to study the transcriptional  
 109 kinetics of the heat-shock response in human (Vihervaara et al., 2017), mouse (Mahat et al., 2016), and fly (Duarte et al., 2016), for *de novo* discovery of promoters and enhancers in cells and tissues (Chu et al., 2018; Danko et al., 2015; Kruesi et al., 2013; Kwak, 2013; Wang et al., 2019), for transcription rate detection (Danko et al., 2013; Jonkers et al., 2014), and detection of RNA stability (Blumberg et al., 2019; Core et al., 2014).

114  
 115 The current, published PRO-seq protocol (Mahat et al., 2016) is undoubtedly time  
 116 consuming, technically challenging, and requires significant amounts of starting material (0.5–2  
 117 x 10<sup>7</sup> cells). This is largely due to multiple streptavidin bead binding and subsequent elution  
 118 steps (Fig. 1A), which require technical finesse with phenol:chloroform extraction and ethanol

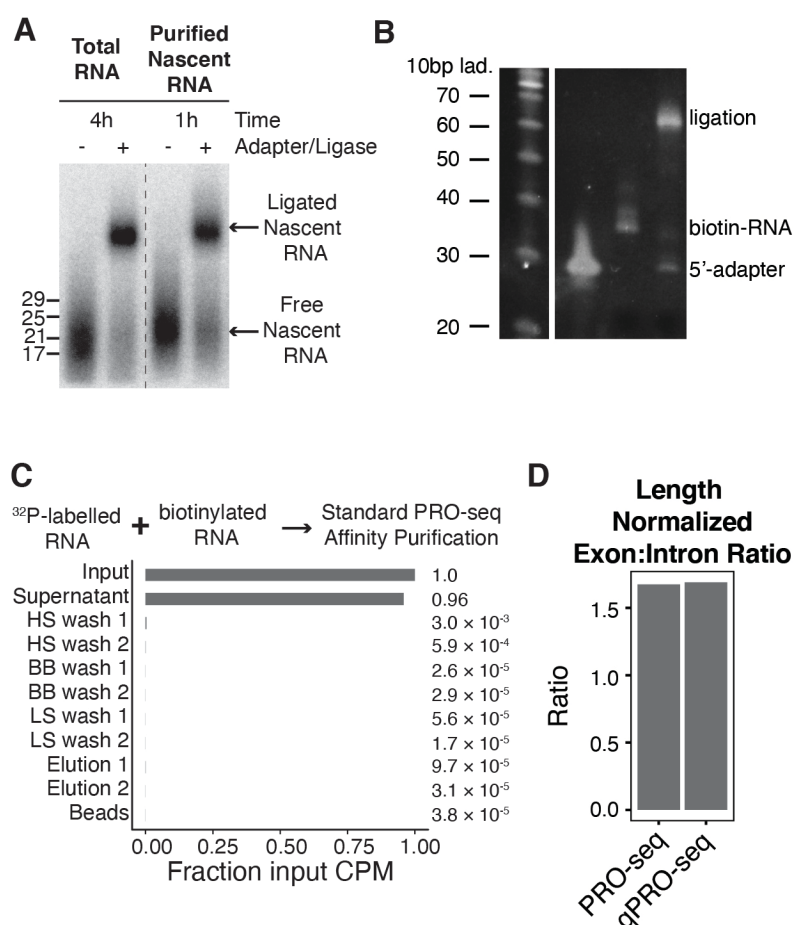

**Figure 2: Validation of key enzymatic steps. (A)** Ligation of the 3' adapter in hydrolyzed total RNA vs. purified nascent RNA. <sup>32</sup>P labelled nascent RNA was ligated for 1 h using the ligation conditions in this protocol or using the standard PRO-seq ligation conditions in (Mahat et al., 2016). **(B)** Efficiency of ligation to synthetic biotinylated RNA in 15% PEG8000 **(C)** Stringency of biotin-RNA affinity purification with MyOne C1 Streptavidin beads. Excess <sup>32</sup>P labelled non-biotinylated RNA was mixed with biotinylated RNA, and CPM of each fraction was assessed using liquid scintillation counting. **(D)** PRO-seq and qPRO-seq show similar levels of exonic reads relative to intronic reads genome-wide.

119 precipitation of nucleic acids and present repeated opportunity for loss of material. This has  
120 limited the adoption of PRO-seq by inexperienced laboratories and impeded studies of  
121 transcription in experimental systems that utilize rare or precious biological samples.

122

123 To address these shortcomings, we optimized the PRO-seq protocol to simplify library  
124 preparation and facilitate use of scarce input material in an improved protocol deemed qPRO-  
125 seq (quick Precision Run-On and sequencing; Fig. 1). The original protocol requires 4-5 working  
126 days to complete, and included three bead binding steps, and five phenol:chloroform extractions  
127 and ethanol precipitations. By performing 3' adapter ligation to hydrolyzed total RNA instead of  
128 affinity purified nascent RNA, we eliminated one bead-binding step. We have validated that this  
129 ligation reaction is equally efficient to the standard PRO-seq ligation to purified nascent RNA  
130 (Fig. 2A). Downstream enzymatic reactions are then performed while nascent RNA is affixed to  
131 streptavidin beads (Fig. 2B), which eliminates another bead-binding step. On-bead reactions are  
132 performed in 2X volume to aid in handling, and simple bead washing steps replace numerous  
133 phenol:chloroform extractions and ethanol precipitations. The resulting single bead-binding  
134 protocol is much faster and easier than the original PRO-seq protocol (Fig. 1). It is feasible to  
135 start from permeabilized cells and end with adapter ligated cDNA in a single day (~10 h; Fig.  
136 1B). Furthermore, an option for column-based purification of RNA after the run-on reaction can  
137 eliminate another organic extraction step. Reverse transcription can be performed on beads,  
138 which completely eliminates organic extraction from the protocol, albeit with reduced efficiency.

139

140 In theory, reducing the number of affinity purifications and ligating adapters to bulk RNAs  
141 could reduce the specificity of the assay for nascent RNA. However, we have found that MyOne  
142 Streptavidin C1 beads, which have higher binding capacity per substrate area and are negatively  
143 charged to repel non-specific nucleic acid binding, sufficiently enrich nascent RNA over other  
144 cellular RNAs (Fig. 2C). Importantly, if nascent RNA was contaminated with mRNA, the number  
145 of reads mapping within exons would increase relative to reads mapping within introns. However,  
146 when we compared the length-normalized ratio of exonic reads to intronic reads, we observed  
147 no detectable difference between the original protocol and the improved protocol presented here  
148 (Fig. 2D).

149

150 Additional protocol changes have further simplified and improved the protocol. Careful  
151 titration of adapters eliminates the need for PAGE purification (Fig. 3A–B), which is difficult and  
152 time intensive and can introduce insert-size bias in the final libraries. Incorporation of a dual-UMI  
153 strategy reduces concern about PCR-duplicate reads. Furthermore, this eliminates the need for  
154 time-consuming test-amplification, except as an initial troubleshooting step when establishing  
155 the assay in a new cell type or with a new amount of input material.

156

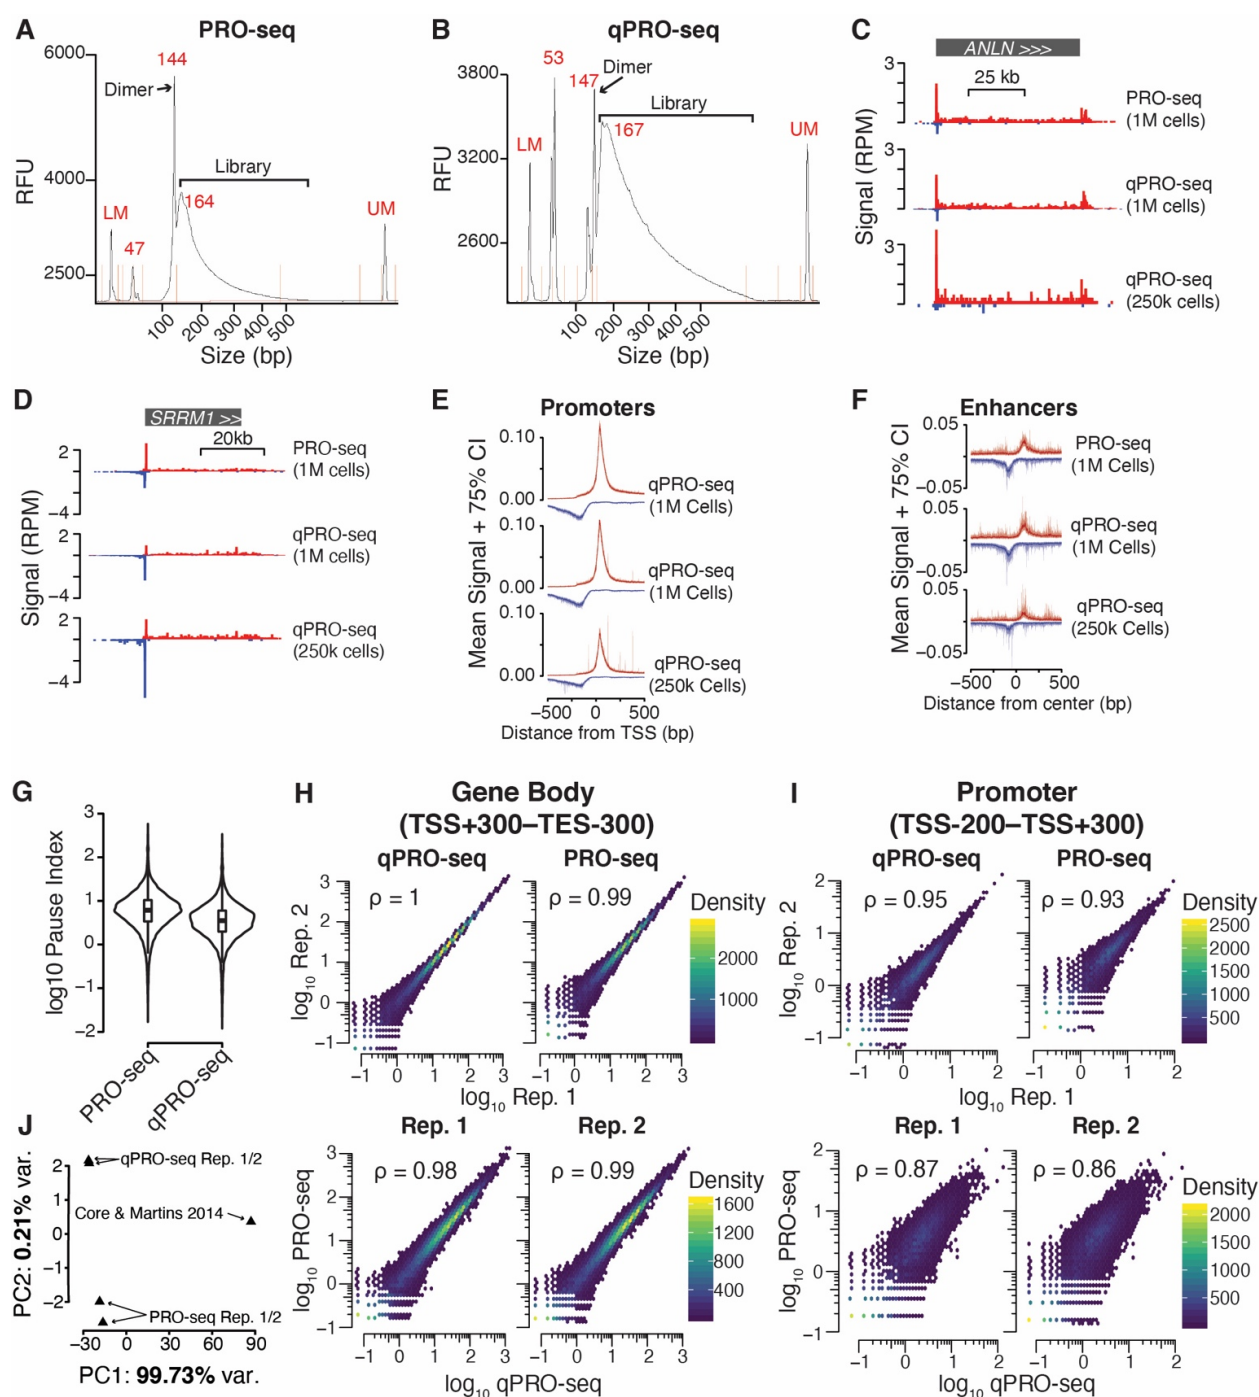

**Figure 3: Direct comparison of PRO-seq and qPRO-seq in K562 cells.** Bioanalyzer traces of libraries made using PRO-seq (**A**) and qPRO-seq. Library and adapter dimer are highlighted. (**B**) Browser shots showing reads-per-million (RPM) normalized signal for PRO-seq (1M cells), qPRO-seq (1M cells), and qPRO-seq (250k cells) at *ANLN* (**C**) and *SRRM1* (**D**). Metaprofiles of signal at promoters (**E**) and enhancers (**F**). Mean and 75% confidence intervals are derived from 1000 subsamplings of 10% of regions. Enhancers are dREG peaks > 10 kb from a promoter. (**G**) Distribution of pause indicies at all genes in PRO-seq compared to qPRO-seq. (**H**) Correlation of RPM in gene body regions (TSS+300 to TES-300) between replicates and between protocols. (**I**) Correlation of RPM in promoter regions (TSS-200 to TSS+300) between replicates and between protocols. (**J**) Principal component analysis of PRO-seq, qPRO-seq, and published PRO-seq (Core et al. 2014) data in K562 cells. Variance explained (%) by each component is noted on the axis.

158 We have found that  $10^6$  cells are sufficient input material for this new protocol, and that it can  
159 even be performed with as few as  $0.05\text{--}0.25 \times 10^6$  cells (Fig 3C–F). Data quality typically  
160 increases up to  $10^6$  cells but much smaller improvements are seen by further increasing cell  
161 number. Polymerases are sampled from fewer positions overall in libraries made with  $0.25 \times 10^6$   
162 cells, which causes data to look “spiky” and inflates read counts at highly expressed genes when  
163 normalizing per million mapped reads (Fig. 3C–F). Cell numbers required for high quality library  
164 generation will vary with the transcription activity of each cell type, with fast-dividing cultured  
165 cells typically showing the greatest activity.

166  
167 We performed the new qPRO-seq protocol alongside the original protocol in two biological  
168 replicates of  $10^6$  K562 cells (Fig. 3). We observe that the C1 beads decrease the bias against  
169 long RNAs seen with M280 beads, resulting in a relatively higher capture rate of gene body  
170 reads which results in lower overall pause indices (pause index is pause region signal divided  
171 by length-normalized gene body signal, so increased gene-body capture rate and unchanged  
172 pause region capture rate decreases pause index; Fig. 3G). In aggregate profiles, we observe  
173 no detectable difference in promoter or enhancer profiles across protocols (Fig. 3E–F). Though  
174 the overall number of unique reads obtained are lower in libraries made with  $0.25 \times 10^6$  cells as  
175 is expected with scarce input material, we still observe transcription at many enhancers (Fig.  
176 3F). We find that both assays can reproducibly quantify both gene body and promoter-proximal  
177 polymerases (Fig. 3H–I) and discover similar sets of regulatory elements using dREG (Wang et  
178 al., 2019). The promoter region is more inherently variable, but using principal component  
179 analysis, we were able to determine that when compared to published, deeply sequenced PRO-  
180 seq data in K562 cells (Core et al., 2014), batch effect and/or sequencing depth accounted for  
181 >99% of variance in both the gene body and promoter region, while choice of protocol (PRO-  
182 seq or qPRO-seq) accounted for less than 0.3% of variance (Fig. 3J). This improved and  
183 optimized protocol expands the utility and accessibility of PRO-seq without sacrificing precision or  
184 data quality.

185

## 186 **Data Availability**

187 K562 PRO-seq and qPRO-seq raw sequencing data, processed bigWig files and dREG peaks  
188 files have been deposited in GEO (GSE150625).

189

## 190 **Code Availability**

191 Code used to analyze data and generate figures in this manuscript is available at  
192 <https://github.com/JAJ256/qPRO>. The pipeline used for PRO-seq alignment and processing is  
193 available at [https://github.com/JAJ256/PROseq\\_alignment.sh](https://github.com/JAJ256/PROseq_alignment.sh). “Browser shots” were generated  
194 using code found here: [https://github.com/JAJ256/browser\\_plot.R](https://github.com/JAJ256/browser_plot.R).

195

196 **Author Contributions**

197 J.J. performed PRO-seq and qPRO-seq experiments and analyzed data. J.J., L.J.C., L.M.W,  
198 and L.A.W wrote and revised the manuscript. L.A.W., L.M.W., G.J.V., and A.D. optimized on-  
199 bead steps biochemical steps. All authors reviewed and approved the final manuscript. E.J.R.  
200 contributed the qPCR protocol. E.M.W. performed experiments to optimize the protocol for low-  
201 input experiments. All authors contributed experimentally or conceptually to the development of  
202 this protocol.

203

204 **Protocol Availability**

205 The protocol presented in this manuscript is also available at  
206 <https://dx.doi.org/10.17504/protocols.io.57dg9i6> and will be updated as further improvements  
207 are made.

208

209 **Acknowledgements**

210 We thank the Cornell BRC Genomics facility and Peter Schweitzer for assistance with Illumina  
211 sequencing. We acknowledge many colleagues who have now used PRO-seq for various  
212 applications that we did not cite in this manuscript due to space constraints. This work was  
213 supported by NIH grants R01-GM025232 (to J.T.L.), R21-HG009021 and R35-GM128857 (to  
214 L.J.C.), and R01-HG009309 (to C.G.D). J.J. was supported by NHGRI fellowship F31-  
215 HG010820. The content is solely the responsibility of the authors and does not necessarily  
216 represent the official views of the National Institutes of Health.

217



## 218 2. Materials

219 **! CRITICAL:** Care should be taken to avoid nuclease contamination. Change  
220 gloves routinely and prepare/use nuclease-free reagents.

### 221 2.1 Chemicals and Reagents

- 222 1. Diethyl pyrocarbonate (DEPC; Sigma-Aldrich, cat. no. D5758)
- 223 **! CAUTION:** DEPC is toxic and harmful
- 224 2. DEPC treated ddH<sub>2</sub>O (0.1% v/v)
- 225 3. 4 M KCl (see Note 1)
- 226 4. 5 M NaCl (see Note 1)
- 227 5. 1M MgCl<sub>2</sub> (see Note 1)
- 228 6. 10% (v/v) Triton X-100 (see Note 2)
- 229 7. 2% (v/v) Sarkosyl (Sigma-Aldrich, cat. no. L5125) (see Note 2)
- 230 8. 2% (v/v) Tween-20 (see Note 2)
- 231 9. 10 % Igepal® CA-630 (Millipore Sigma cat. no. I8896) (see Note 2)
- 232 10. 0.1 M DTT (see Note 2)
- 233 11. 1 M Sucrose (see Note 2)
- 234 12. 0.5 M EDTA, pH 8.0 (see Note 2)
- 235 13. 0.1 M EGTA, pH 8.0 (see Note 2)
- 236 14. Tris-Cl, pH 6.8 (See Note 2)
- 237 15. Tris-Cl, pH 7.4 (See Note 2)
- 238 16. Tris-Cl, pH 8.0 (See Note 2)
- 239 17. Glycerol
- 240 18. 1 N NaOH
- 241 19. 100% Ethanol
- 242 20. 75% Ethanol
- 243 21. Biotin-11-CTP 10 mM (PerkinElmer, cat. no. NEL542001EA)
- 244 22. Biotin-11-UTP 10 mM (PerkinElmer, cat. no. NEL543001EA)
- 245 23. Biotin-11-GTP 10 mM (PerkinElmer, cat. no. NEL545001EA)
- 246 24. Biotin-11-ATP 10 mM (PerkinElmer, cat. no. NEL544001EA)
- 247 25. GTP, 100 mM (Roche, cat. no. 11277057001)
- 248 26. ATP, 100 mM (Roche, cat. no. 11277057001)
- 249 27. Trypan Blue
- 250 28. Dynabeads™ MyOne™ Streptavidin C1 Beads (Invitrogen, cat. no. 65002)
- 251 29. TRIzol™ Reagent (Invitrogen, cat. no. 15596018)
- 252 30. TRIzol™ LS Reagent (Invitrogen, cat. no. 10296028) (optional, see Note 3)
- 253 31. Total RNA Purification Kit (Norgen, cat. no. 37500) (optional, see Note 3)
- 254 32. Chloroform

- 255 33. GlycoBlue™ (Invitrogen, cat. no. AM9515)
- 256 34. SUPERase-In™ RNase Inhibitor (20 U/μL) (Invitrogen, cat. no. AM2694)
- 257 35. Pierce™ Protease Inhibitor Tablets (Thermo Scientific cat. no. A32963)
- 258 36. T4 RNA Ligase (10 U/μL), supplied with 10X T4 RNA ligase buffer, 10 mM
- 259 ATP and 50% (w/v) PEG8000 (NEB cat. no. M0204S)
- 260 37. RNA 5' pyrophosphohydrolase (RppH; 5 U/μL) (NEB, cat. no. M0356S)
- 261 38. 10X ThermoPol Reaction Buffer (NEB, cat. no. B9004S)
- 262 39. T4 polynucleotide kinase (PNK; 10 U/μL), supplied with 10X PNK buffer
- 263 (NEB, cat. no. M0201)
- 264 40. Maxima H Minus Reverse Transcriptase (200 U/μL) (Thermo Scientific, cat.
- 265 no. EP0751)
- 266 41. dNTP mix, 12.5mM each (Roche, cat. no. 03622614001)
- 267 42. Q5® High-Fidelity DNA Polymerase, supplied with 5X Q5 Reaction Buffer
- 268 and 5X High GC-Enhancer (NEB cat. no. M0491S)
- 269 43. Micro Bio-Spin™ RNase free P-30 Gel Columns (Bio-Rad, cat. no.
- 270 7326250) (optional, see Note 3)
- 271 44. RNA and DNA oligos (IDT DNA) (see Table 1 and Notes 4–6)
- 272 45. Agencourt AMPure XP SPRI beads (Beckman-Coulter, cat. no. A63880)
- 273 46. SYBR Gold stain (Invitrogen, cat. no. S11494)
- 274 47. Costar® Spin-X® 0.22 μm Centrifuge Tube Filters (Corning, cat. no. 1860)
- 275 48. SsoAdvanced Universal SYBR Green Supermix (BioRad, cat. no. 1725270)
- 276

## 277 2.2 Buffers

- 278 1. Permeabilization Buffer: 10 mM Tris-Cl [pH 8.0] ,10 mM KCl, 250 mM
- 279 Sucrose, 5 mM MgCl<sub>2</sub>, 1 mM EGTA, 0.1% (v/v) Igepal, 0.5 mM DTT, 0.05%
- 280 (v/v) Tween-20, and 10% (v/v) Glycerol in DEPC H<sub>2</sub>O. Add 1 Pierce
- 281 protease inhibitor tablet and 10 μl SUPERase-In RNase inhibitor per 50 mL
- 282 (see Note 7)
- 283 2. Cell Wash buffer: 10 mM Tris-Cl [pH 8.0], 10 mM KCl, 250 mM sucrose,
- 284 5 mM MgCl<sub>2</sub>, 1 mM EGTA, 0.5 mM DTT, and 10% (v/v) Glycerol in DEPC
- 285 H<sub>2</sub>O. Add 1 Pierce protease Inhibitor tablet and 10 μl SUPERase-In RNase
- 286 inhibitor per 50 mL (see Note 7)
- 287 3. Freeze buffer: 50 mM Tris-Cl [pH 8.0], 40% (v/v) glycerol, 5 mM MgCl<sub>2</sub>,
- 288 1.1 mM EDTA, and 0.5 mM DTT in DEPC H<sub>2</sub>O. Add 10 μl SUPERase-In
- 289 RNase inhibitor per 50 mL (see Note 7)
- 290 4. Bead Preparation Buffer: 0.1 N NaOH and 50 mM NaCl in DEPC H<sub>2</sub>O.
- 291 5. Bead Binding Buffer: 10 mM Tris-HCl [pH 7.4], 300 mM NaCl, 0.1% (v/v)
- 292 Triton X-100, 1 mM EDTA in DEPC H<sub>2</sub>O. Add 2 μl SUPERase-In RNase

- 293 Inhibitor per 10 mL (see Note 7)
- 294 6. High Salt Wash buffer: 50 mM Tris-HCl [pH 7.4], 2 M NaCl, 0.5% (v/v) Triton
- 295 X-100, and 1 mM EDTA in DEPC H<sub>2</sub>O. Add 2  $\mu$ l SUPERase-In RNase
- 296 Inhibitor per 10 mL (see Note 7)
- 297 7. Low Salt Wash Buffer: 5 mM Tris-HCl [pH 7.4], 0.1% (v/v) Triton X-100, and
- 298 1 mM EDTA in DEPC H<sub>2</sub>O. Add 2  $\mu$ l SUPERase-In RNase Inhibitor per 10
- 299 mL (see Note 7)
- 300 8. 2X Run-On Master Mix (2XROMM): 10 mM Tris-Cl [pH 8.0], 5 mM MgCl<sub>2</sub>, 1
- 301 mM DTT, 300 mM KCl, 40  $\mu$ M Biotin-11-CTP, 40  $\mu$ M Biotin-11-UTP, 40  $\mu$ M
- 302 Biotin-11-ATP, 40  $\mu$ M Biotin-11-GTP, 1% (w/v) Sarkosyl in DEPC H<sub>2</sub>O. Add 1
- 303  $\mu$ L SUPERase-In RNase Inhibitor per reaction (see Note 8).
- 304

### 305 **2.3 Consumables**

- 306 1. Low-bind, nuclease-free microcentrifuge tubes (0.5 and 1.5 mL)
- 307 2. Low-bind, nuclease-free, filtered pipette tips
- 308 3. Wide bore, low-bind, nuclease-free, filtered P1000 and P200 tips (or cut
- 309 standard bore ~1cm from tip)
- 310

### 311 3. Methods

#### 312 3.1 Cell Permeabilization

313 **! CRITICAL:** ALL steps should be carried out on ice or in a cold room

314 1. Prepare permeabilization buffer, wash buffer, and freeze buffer and place on  
315 ice (see Note 7).

316 2. Proceed using one of the following options:

317

318 Option 3.1.2.1: Adherent cells (volumes are for 10 cm plates):

319 1. Wash cells with 10 mL ice cold PBS.

320 2. Repeat the PBS wash step for a total of two washes.

321 3. Add 5 mL ice cold permeabilization buffer, scrape cells, and transfer  
322 to a conical tube.

323 4. Rinse plate with 5 mL permeabilization buffer and pool cells in conical  
324 tube ( $V_f = 10$  mL).

325

326 Option 3.1.2.2: Suspension cells:

327 1. Transfer cells into conical tube and spin down at 700–1000 x g for 4  
328 min at 4°C (see Notes 9–10).

329 2. Wash with 10 mL ice cold PBS (see Notes 10–11).

330 3. Repeat the PBS wash for a total of two washes.

331 4. Resuspend in 10 mL cold permeabilization buffer (see Note 11).

332

333 3. Continue here from step 3.1.2.1.4 or 3.1.2.2.4.

334 4. Incubate on ice for 5 min.

335 5. Check for permeabilization with Trypan blue. Greater than 98%  
336 permeabilization is ideal (see Note 12).

337 6. Spin down at 700–1000 x g for 4 min at 4°C (see Notes 9–10).

338 7. Wash with 10 mL ice cold cell wash buffer (see Notes 10–11).

339 8. Repeat the cell wash buffer wash for a total of two washes.

340 9. Decant wash buffer, and then carefully pipette off remaining buffer and  
341 discard without disturbing the cell pellet.

342 10. Using wide-bore tips, resuspend in 250  $\mu$ L cold freeze buffer and transfer to  
343 a 1.5 mL tube.

344 11. Rinse the conical tube with an additional 250  $\mu$ L freeze buffer and pool ( $V_f =$   
345 500  $\mu$ L).

346 12. Count cells and add permeabilized spike-in cells if desired (see Notes 13–  
347 14).

- 348 13. Spin down at 1000 x g for 5 min at 4°C (see Note 15).  
349 14. Resuspend the desired number of cells for each run-on reaction in 52  $\mu$ L  
350 freeze buffer (see Note 16).  
351 15. Continue to the run-on or snap freeze 52  $\mu$ L aliquots in LN<sub>2</sub> and store at -  
352 80°C (see Note 17).

### 3.2 Preparation

- 353  
354  
355 1. Pre-chill a microcentrifuge to 4°C.  
356 2. Set a heat block with water in the wells to 37°C and another to 65°C and  
357 allow temperature to equilibrate.  
358 3. Prepare bead preparation buffer, high salt wash buffer, low salt wash buffer,  
359 and binding buffer (see Note 7).  
360 4. For each run-on reaction, wash 10  $\mu$ L Dynabeads™ MyOne™ Streptavidin  
361 C1 Beads once in 1 mL bead preparation buffer using a magnet stand.  
362 Beads can be washed in bulk (see Notes 18–19).  
363 5. Wash beads twice with 1 mL binding buffer (see Note 19–20).  
364 6. Resuspend the beads in 25  $\mu$ L binding buffer per sample. Place beads on  
365 ice or at 4°C until needed.  
366

### 3.3 Run-On Reaction

- 367  
368 1. Prepare 2XROMM equilibrate at 37°C (30°C for Drosophila) (see Note 8  
369 and 21).  
370 2. Using a wide bore tip, add 50  $\mu$ L of permeabilized cells to new 1.5 mL tube.  
371 3. Pipette 50  $\mu$ L of preheated 2XROMM into each reaction tube (already  
372 containing permeabilized cells). *Gently and thoroughly pipette the mixture*  
373 *15 times*. It is extremely important to thoroughly mix the reaction so that  
374 nucleotides diffuse into highly viscous chromatin!  
375 4. Incubate in a thermomixer at 37°C (30°C for Drosophila) at 750 RPM for 5  
376 min. Have RL buffer from Norgen kit or TRIzol LS ready for use.  
377 5. Proceed to step 3.4.1.1 or 3.4.1.2 depending on choice of RNA extraction  
378 method immediately after the 5 min reaction is complete (take the sample  
379 off the heat block and immediately add buffer RL or TRIzol LS).  
380

381  
382

Use the table below to coordinate timing of run-on reaction and addition of TRIzol or Buffer RL. Start the timer (counting up) when you add the first sample:

| Time  | Step                                                   |
|-------|--------------------------------------------------------|
| 00:00 | Mix permeabilized cells with 2XROMM for Sample 1       |
| 01:00 | Mix permeabilized cells with 2XROMM for Sample 2       |
| 02:00 | Mix permeabilized cells with 2XROMM for Sample 3       |
| 03:00 | Mix permeabilized cells with 2XROMM for Sample 4       |
| 04:00 | Mix permeabilized cells with 2XROMM for Sample 5       |
| 05:00 | Add buffer RL or TRIzol LS to Sample 1, vortex briefly |
| 06:00 | Add Buffer RL or TRIzol LS to Sample 2, vortex briefly |
| 07:00 | Add Buffer RL or TRIzol LS to Sample 3, vortex briefly |
| 08:00 | Add Buffer RL or TRIzol LS to Sample 4, vortex briefly |
| 09:00 | Add Buffer RL or TRIzol LS to Sample 5, vortex briefly |

383  
384  
385  
386

### 3.4 Total RNA Extraction and Base Hydrolysis

1. Proceed from step 3.3.5 to one of the following options:

387  
388  
389  
390  
391  
392  
393  
394  
395  
396  
397  
398  
399  
400  
401  
402  
403  
404  
405  
406

#### Option 3.4.1.1: NORGEN RNA Extraction (see Note 3):

1. Add 350  $\mu$ L RL buffer and vortex.
2. Add 240  $\mu$ L 100% ethanol and vortex.
3. Apply solution to Norgen RNA extraction column.
4. Spin at 3,500 x g for 1 min at 25°C.
5. Add 400  $\mu$ L wash solution A (ensure ethanol has been added).
6. Spin at 14,000 x g for 1 min at 25°C.
7. Discard flow through.
8. Repeat wash (steps 6 & 7) for a total of two washes.
9. Spin at 14,000 x g for 2 min to dry column.
10. Add 50  $\mu$ L DEPC H<sub>2</sub>O and vortex.
11. Elute by spinning at 200 x g for 2 min at 25°C and then at 14,000 x g for 1 min at 25°C.
12. Elute again with 50  $\mu$ L H<sub>2</sub>O and pool eluates ( $V_f = 100 \mu$ L).
13. Denature at 65°C for 30 sec and then snap cool on ice.
14. Add 25  $\mu$ L ice cold 1 N NaOH and incubate 10 min on ice.
15. Add 125  $\mu$ L cold 1 M Tris-Cl pH 6.8, mix by pipetting.
16. Add 5  $\mu$ L 5 M NaCl and 1  $\mu$ L GlycoBlue and mix.
17. Add 625  $\mu$ L 100% Ethanol and vortex (see Note 22).
18. Centrifuge the samples at >20,000 x g for 20 minutes at 4°C (see

- 407 Note 23).
- 408 19. Carefully pipette supernatant off and discard (see Note 24).
- 409 20. Add 750  $\mu$ L 70% ethanol.
- 410 21. Mix by gentle inversion and spin down briefly.
- 411 22. Carefully pipette supernatant off and discard (see Note 24).
- 412 23. Airdry the RNA pellet (see Note 25).
- 413 24. Resuspend in 6  $\mu$ L DEPC H<sub>2</sub>O.

414

415 Option 3.4.1.2: Trizol LS RNA Extraction (See Note 3):

- 416 1. Add 250  $\mu$ L TRIzol LS with a wide bore P1000 tip, pipette vigorously
- 417 but carefully >10X until all white globs of nucleoproteins are
- 418 homogenized.
- 419 2. Pipette mix again with a standard bore P1000 tip. Samples should be
- 420 completely homogenous.
- 421 3. Vortex vigorously for at least 15 seconds.
- 422 4. Incubate samples on ice until all run-on reactions are complete.
- 423 5. Add 65  $\mu$ L chloroform (see Note 26).
- 424 6. Vortex the samples at max speed for 15 sec, then incubate on ice for
- 425 3 min.
- 426 7. Centrifuge the samples at >20,000 x g for 8 min at 4°C.
- 427 8. Transfer the ~200  $\mu$ L aqueous phase into a new tube (see Note 27).
- 428 9. Add 1  $\mu$ L of GlycoBlue and mix.
- 429 10. Add 2.5X volumes (~500  $\mu$ L) 100% ethanol and vortex.
- 430 11. Centrifuge at >20,000 x g for 20 min at 4°C (see Note 23).
- 431 12. Carefully pipette supernatant off and discard (see Note 24).
- 432 13. Add 750  $\mu$ L 70% ethanol.
- 433 14. Mix by gentle inversion and quickly spin down.
- 434 15. Carefully pipette supernatant off and discard (see Note 24).
- 435 16. Airdry the RNA pellet (see Note 25).
- 436 17. Resuspend in 30  $\mu$ L DEPC H<sub>2</sub>O.
- 437 18. Briefly denature at 65°C for 30 sec and then snap cool on ice.
- 438 19. Add 7.5  $\mu$ L ice cold 1 N NaOH and incubate on ice for 10 min.
- 439 20. Add 37.5  $\mu$ L 1 M TrisCl pH 6.8, mix by pipetting.
- 440 21. Pass through a calibrated Bio-Rad RNase free P-30 column (follow
- 441 manufacturer's instructions).
- 442 22. Bring volume to 200  $\mu$ L with DEPC H<sub>2</sub>O (add ~ 125  $\mu$ L).
- 443 23. Add 1  $\mu$ L Glycoblue and 8  $\mu$ L 5 M NaCl and vortex.
- 444 24. Add 500  $\mu$ L 100% ethanol and vortex (see Note 22).

- 445 25. Centrifuge at  $>20,000 \times g$  for 20 minutes at  $4^{\circ}\text{C}$  (see Note 23).  
446 26. Carefully pipette supernatant off and discard (see Note 24).  
447 27. Add  $750 \mu\text{L}$  70% ethanol.  
448 28. Mix by gentle inversion and quickly spin down.  
449 29. Carefully pipette supernatant off and discard (see Note 24).  
450 30. Airdry the RNA pellet (see Note 25).  
451 31. Resuspend in  $6 \mu\text{L}$  DEPC  $\text{H}_2\text{O}$ .

452

### 453 3.5 3' RNA Adaptor Ligation

- 454 1. Continue here from step 3.4.1.1.24 or 3.4.1.2.31:  
455 2. Add  $1 \mu\text{L}$   $10 \mu\text{M}$  VRA3 (see Note 28).  
456 3. Denature at  $65^{\circ}\text{C}$  for 30 sec and snap cool on ice.  
457 4. Prepare ligation mix in the following order (see Note 29):  
458

| Reagent                     | Volume                        |
|-----------------------------|-------------------------------|
| 10X T4 RNA ligase buffer    | $2 \mu\text{L}$               |
| ATP (10 mM)                 | $2 \mu\text{L}$               |
| SUPERase-In RNase Inhibitor | $1 \mu\text{L}$ (see Note 30) |
| 50% PEG8000                 | $6 \mu\text{L}$               |
| T4 RNA Ligase I (NEB)       | $2 \mu\text{L}$               |

459

- 460 5. Add  $13 \mu\text{L}$  and mix by pipetting 10–15X ( $V_f = 20 \mu\text{L}$ ).  
461 6. Incubate at  $25^{\circ}\text{C}$  for 1 h.

462

### 463 3.6 Streptavidin Bead Binding

- 464 1. Add  $55 \mu\text{L}$  binding buffer to each sample ( $V_f = 75 \mu\text{L}$ ).  
465 2. Add  $25 \mu\text{L}$  pre-washed beads to each sample ( $V_f = 100 \mu\text{L}$ ).  
466 3. Incubate for 20 min at  $25^{\circ}\text{C}$  with end to end rotation.  
467 4. Wash once with  $500 \mu\text{L}$  High Salt Wash buffer with tube swap (see Notes  
468 19, 31–32).  
469 5. Wash once with  $500 \mu\text{L}$  Low Salt Wash buffer (see Notes 19, 31, 33).  
470



471  
472  
473

### 3.7 On-Bead 5' Hydroxyl Repair

1. Resuspend beads in 19  $\mu$ L PNK mix ( $V_f = 20 \mu$ L; see Note 34):

| Reagent                     | Volume                  |
|-----------------------------|-------------------------|
| DEPC H <sub>2</sub> O       | 13 $\mu$ L              |
| 10X PNK buffer              | 2 $\mu$ L               |
| 10 mM ATP                   | 2 $\mu$ L               |
| T4 PNK (NEB)                | 1 $\mu$ L               |
| SUPERase-IN RNase Inhibitor | 1 $\mu$ L (see Note 30) |

474  
475  
476

2. Incubate at 37°C for 30 min (see note 35).

477  
478  
479  
480  
481

### 3.8 On-Bead 5' Decapping

1. Place the tubes on a magnet stand and remove supernatant (see Notes 19–20, 33).
2. Resuspend the beads in 19  $\mu$ L RppH mix ( $V_f = 20 \mu$ L; see Notes 34, 36):

| Reagent                     | Volume     |
|-----------------------------|------------|
| DEPC H <sub>2</sub> O       | 15 $\mu$ L |
| 10X ThermoPol Buffer        | 2 $\mu$ L  |
| RppH                        | 1 $\mu$ L  |
| SUPERase-In RNase Inhibitor | 1 $\mu$ L  |

482  
483  
484

3. Incubate at 37°C for 1 h (see note 35).

485  
486  
487  
488  
489

### 3.9 On-Bead 5' RNA Adaptor Ligation

1. Place the tubes on a magnet stand and remove supernatant (see Notes 19–20, 33).
2. Resuspend the beads in 7  $\mu$ L adapter mix ( $V_f = 8 \mu$ L):

| Reagent                         | Volume    |
|---------------------------------|-----------|
| DEPC H <sub>2</sub> O           | 6 $\mu$ L |
| REV5 (10 $\mu$ M) (see Note 28) | 1 $\mu$ L |

490  
491  
492  
493

3. Denature at 65°C for 30 sec, then snap cool on ice.
4. Prepare ligation mix in the following order (see Note 29):

| Reagent                     | Volume                  |
|-----------------------------|-------------------------|
| 10x T4 RNA ligase buffer    | 2 $\mu$ L               |
| ATP (10 mM)                 | 2 $\mu$ L               |
| SUPERase-In RNase Inhibitor | 1 $\mu$ L (see Note 30) |
| 50% PEG8000                 | 6 $\mu$ L               |
| T4 RNA ligase I             | 1 $\mu$ L               |

494

495

496

497

498

### 3.10 TRIzol Elution of RNA

499

500

501

502

503

504

505

506

507

508

509

510

511

512

513

514

515

516

517

### 3.11 Off-Bead Reverse Transcription

518

519

5. Add 12  $\mu$ L to each tube ( $V_f = 20 \mu$ L).
6. Incubate at 25°C for 1 h (see Note 35).

1. Wash once with 500  $\mu$ L High Salt Wash buffer with tube swap (see Notes 19, 31–32).
2. Wash once with 500  $\mu$ L Low Salt Wash buffer (see Notes 19, 31, 33).
3. Resuspend beads in 300  $\mu$ L TRIzol.
4. Vortex at max speed for >20 sec, then incubate on ice for 3 min.
5. Add 60  $\mu$ L chloroform (see Note 26).
6. Vortex at max speed for 15 sec, then incubate on ice for 3 min.
7. Centrifuge at >20,000 x g for 8 min at 4°C.
8. Transfer the aqueous phase (~180  $\mu$ L) to a new tube (see Note 27).
9. Add 1  $\mu$ L GlycoBlue and mix.
10. Add 2.5X volumes (~450  $\mu$ L) 100% ethanol and vortex.
11. Centrifuge the samples at >20,000 x g for 20 min at 4°C (see Note 23).
12. Carefully pipette supernatant off and discard (see Note 24).
13. Add 750  $\mu$ L 70% ethanol.
14. Mix by gentle inversion and quickly spin down.
15. Carefully pipette supernatant off and discard (see Note 24).
16. Air-dry the RNA pellet (see Note 25).

| Reagent                 | Volume      |
|-------------------------|-------------|
| DEPC H <sub>2</sub> O   | 8.7 $\mu$ L |
| RP1 (10 $\mu$ M)        | 4           |
| dNTP mix (12.5 mM each) | 0.8 $\mu$ L |

520

521

2. Denature at 65°C for 5 min and snap cool on ice.

522  
523

3. Prepare RT master mix:

| Reagent                     | Volume                    |
|-----------------------------|---------------------------|
| 5X RT Buffer                | 4 $\mu$ L                 |
| 100 mM DTT                  | 1 $\mu$ L                 |
| SUPERase-In RNase Inhibitor | 0.5 $\mu$ L (see Note 30) |
| Maxima H Minus RT enzyme    | 1 $\mu$ L                 |

524  
525  
526  
527  
528  
529  
530

4. Add 6.5  $\mu$ L to each sample ( $V_i = 20 \mu$ L).
5. Cycle as follows: 50°C for 30 min, 65°C for 15 min, 85°C for 5 min, then hold at 4°C.
6. Immediately proceed to PreCR, test amplification, or full-scale amplification. Samples can be stored overnight at -20°C (see Notes 38–39).

531

### 3.12 PreCR (Optional, see Note 38)

532  
533  
534  
535

1. Add 2.5  $\mu$ L RPI-n indexed primer (10  $\mu$ M) to each sample. Use different barcodes for samples that will be pooled and sequenced together.
2. Prepare the PreCR master mix:

| Reagent                 | Volume       |
|-------------------------|--------------|
| ddH <sub>2</sub> O      | 33.5 $\mu$ L |
| 5x Q5 buffer            | 20 $\mu$ L   |
| 5x Q5 enhancer          | 20 $\mu$ L   |
| Primer RP1 (10 $\mu$ M) | 1 $\mu$ L    |
| dNTP mix (12.5 mM each) | 2 $\mu$ L    |
| Q5 polymerase (NEB)     | 1 $\mu$ L    |

536  
537  
538  
539  
540  
541  
542  
543  
544  
545  
546

3. Add 77.5  $\mu$ L of the PreCR mix to each sample for final volume 100  $\mu$ L (see Note 40).
4. Amplify libraries for 5 cycles on thermal cycler using the following settings:
  - a. 95°C for 2 min
  - b. 95°C for 30 sec
  - c. 56°C for 30 sec
  - d. 72°C for 30 sec
  - e. Go to step 2 for 4 more times
  - f. 72°C for 5 min
  - g. Hold at 4°C.

547 5. Store samples at -20°C or proceed to test amplification.

548

### 549 3.13 Test Amplification (Gel) (Optional, see Note 39)

- 550 1. Make the first dilution:
- 551 a. If PreCR was performed, add 7.7  $\mu\text{L}$  of the 100  $\mu\text{L}$  PreCR reaction to
  - 552 0.3  $\mu\text{L}$  ddH<sub>2</sub>O for a final volume of 8  $\mu\text{L}$  (see Note 41).
  - 553 b. If PreCR was skipped, add 1.54  $\mu\text{L}$  of the 20  $\mu\text{L}$  RT reaction to 6.46
  - 554  $\mu\text{L}$  ddH<sub>2</sub>O for a final volume of 8  $\mu\text{L}$  (see Note 41).
- 555 2. Make 4-fold serial dilutions by adding 2  $\mu\text{L}$  of each dilution to 6  $\mu\text{L}$  ddH<sub>2</sub>O
- 556 for the next dilution.
- 557 3. Remove and discard 2  $\mu\text{L}$  from the final dilution (all dilutions should now be
- 558 6  $\mu\text{L}$ ).
- 559 4. Choose a target number of total cycles for test amplification using the table
- 560 below (see Note 42). The first dilution simulates full-scale amplification at
- 561 the total number of cycles (PreCR cycles + Test Amp cycles) minus 4.
- 562 Subtract 2 cycles sequentially for the following dilutions.
- 563

| Dilution        | 1  | 2  | 3  | 4  | 5  | 6 | 7 | 8 |
|-----------------|----|----|----|----|----|---|---|---|
| 19 Total Cycles | 15 | 13 | 11 | 9  | 7  | 5 | 3 | 1 |
| 21 Total Cycles | 17 | 15 | 13 | 11 | 9  | 7 | 5 | 3 |
| 23 Total Cycles | 19 | 17 | 15 | 13 | 11 | 9 | 7 | 5 |

564

565 5. Make test PCR mix:

566

| Reagent                          | Volume            |
|----------------------------------|-------------------|
| H <sub>2</sub> O                 | 4.4 $\mu\text{L}$ |
| 5x Q5 buffer                     | 4 $\mu\text{L}$   |
| 5x Q5 enhancer                   | 4 $\mu\text{L}$   |
| Primer RP1 (10 $\mu\text{M}$ )   | 0.5 $\mu\text{L}$ |
| Primer RPI-n (10 $\mu\text{M}$ ) | 0.5 $\mu\text{L}$ |
| dNTP mix (12.5 mM each)          | 0.4 $\mu\text{L}$ |
| Q5 polymerase (NEB)              | 0.2 $\mu\text{L}$ |

567

- 568 6. Add 14 $\mu\text{L}$  PCR mix to the 6  $\mu\text{L}$  diluted test samples ( $V_f = 20 \mu\text{L}$ ).
- 569 7. Amplify reactions for the desired amount of cycles using following settings:
- 570 **! CRITICAL** Remember to account for PreCR. Subtract 5 cycles from your
- 571 total target test amplification cycles.
- 572 a. 95°C for 2 min

- 573 b. 95°C for 30 sec  
574 c. 65°C for 30 sec (see Note 43)  
575 d. 72°C for 30 sec  
576 e. Go to step 2 for the desired number of cycles  
577 f. 72°C for 5 min  
578 g. Hold at 4°C  
579 8. Mix with gel loading dye to 1X and run 10  $\mu$ L on a 2.2% Agarose gel or run 2  
580  $\mu$ L on a native 8% polyacrylamide gel and stain with SYBR Gold.  
581 9. Use the test amplification gel to determine the appropriate number of cycles  
582 for full-scale amplification (see Note 44).  
583

### 3.14 Test Amplification (qPCR) (Optional, see Note 39)

- 584  
585 1. Add 1.54  $\mu$ L of the 20  $\mu$ L RT reaction to 0.46  $\mu$ L ddH<sub>2</sub>O ( $V_f = 2 \mu$ L).  
586 2. Make the qPCR master mix:  
587

| Reagent                                      | Volume       |
|----------------------------------------------|--------------|
| Primer RP1 (10 $\mu$ M)                      | 0.25 $\mu$ L |
| Primer RPI-n (10 $\mu$ M)                    | 0.25 $\mu$ L |
| 2X SsoAdvanced Universal SYBR Green Supermix | 5 $\mu$ L    |
| H <sub>2</sub> O                             | 2.5 $\mu$ L  |

- 588  
589 3. Add 8  $\mu$ L of the qPCR master mix to 2  $\mu$ L diluted RT reaction ( $V_f = 10 \mu$ L).  
590 4. Quickly spin plate to collect liquid.  
591 5. Amplify in a real-time PCR system using the following conditions:  
592 a. Amplification  
593 i. 98 °C for 2 min  
594 ii. 98 °C for 15 sec  
595 iii. 60 °C for 60 sec  
596 iv. Go to step 2 for 39 additional cycles  
597 b. Melting Curve  
598 i. 95 °C for 15 sec  
599 ii. 60 °C for 1 min  
600 iii. 96 °C for 15 sec  
601 iv. 60 °C for 16 sec  
602 6. Calculate the number of full-scale amplification cycles as the cycle number  
603 where  $R_n$  reaches  $0.25 \times R_{n_{max}}$ .  
604  
605

606  
607  
608  
609  
610  
611  
612  
613  
614  
615  
616  
617  
618  
619  
620  
621  
622  
623  
624  
625  
626

### 3.14 Full-Scale Amplification

1. If PreCR and Test Amplification were skipped:
  - a. Add 2.5  $\mu\text{L}$  of an RPI-n indexed primer (10 $\mu\text{M}$ ) to each 20  $\mu\text{L}$  RT reaction. Use different barcodes for samples that will be pooled and sequenced on a single lane.
  - b. Prepare the PCR master mix in step 2 of section 3.12 (PreCR).
  - c. Add 77.5  $\mu\text{L}$  PCR master mix to each sample for final volume 100  $\mu\text{L}$  (see Note 40).
  - d. Run the desired number of cycles (see below)
2. If PreCR was skipped but Test Amplification was performed:
  - a. Add 2.5  $\mu\text{L}$  of an RPI-n indexed primer (10 $\mu\text{M}$ ) to the remaining 18.5  $\mu\text{L}$  RT reaction. Use different barcodes for samples that will be pooled and sequenced on a single lane.
  - b. Prepare the PCR master mix in step 2 of section 3.12 (PreCR) but use 35  $\mu\text{L}$  ddH<sub>2</sub>O instead of 33.5  $\mu\text{L}$ .
  - c. Add 79  $\mu\text{L}$  PCR master mix to each sample for final volume 100  $\mu\text{L}$  (see Note 40).
  - d. Run the desired number of cycles (see below).
3. If PreCR and Test Amplification were performed:
  - a. Prepare the following spike-in PCR mix:

| Reagent                | Volume      |
|------------------------|-------------|
| ddH <sub>2</sub> O     | 3.7 $\mu$ L |
| 5x Q5 buffer           | 1.5 $\mu$ L |
| 5x Q5 enhancer         | 1.5 $\mu$ L |
| dNTP mix (12.5mM each) | 0.5 $\mu$ L |
| Q5 polymerase (NEB)    | 0.5 $\mu$ L |

627

628

629

630

631

632

633

634

635

636

637

638

639

640

641

642

643

644

645

646

647

648

649

650

651

652

653

654

655

656

657

- b. Add 7.7  $\mu$ L PCR spike-in mix to each sample for final volume 100  $\mu$ L (see Note 40).
- c. Run the desired number of cycles.
4. Amplify for the desired number of cycles:
  - ! **CRITICAL:** Remember to account for PreCR. Subtract 5 cycles from your total target full-scale amplification cycles.
  - a. 95°C for 2 min
  - b. 95°C for 30 sec
  - c. 65°C for 30 sec (see Note 43)
  - d. 72°C for 30 sec
  - e. Go to step 2 for the desired number of cycles
  - f. 72°C for 5 min
  - g. Hold at 4°C
5. Allow PCR reactions to reach room temperature.
6. Add 180  $\mu$ L SPRI beads (see Note 45) at room temperature and immediately mix by pipetting > 15X.
7. Incubate at room temperature for 5 min.
8. Place on a magnet stand and remove the supernatant.
9. Wash the beads twice with 70% Ethanol without resuspending.
  - ! **CRITICAL:** Do not disturb the beads or library recovery will be greatly reduced.
10. Airdry the beads for 5 min. Do not over dry the beads.
11. Resuspend beads in 22  $\mu$ L 10 mM Tris-Cl, pH 8.0 (no EDTA).
12. Incubate at room temperature for 5 min.
13. Place the beads on a magnet stand and transfer 20  $\mu$ L to a new tube.
14. Quantify the library using the Qubit dsDNA-HS assay and run on a Bioanalyzer.

### 3.15 PAGE purification (optional, see Note 46)

1. Add Orange G loading dye to 1X to the entire library volume.

- 658 2. Run the samples on a native 8% polyacrylamide gel.
- 659 3. Stain with SYBR Gold.
- 660 4. Cut a gel slice from immediately above the adapter dimer to ~650 bp (see
- 661 Note 44).
- 662 5. Place the gel slice in a 0.5 mL microfuge tube.
- 663 6. Make a hole in the bottom of the tube with an 18G needle.
- 664 7. Nest the 0.5 mL tube in a 1.5 mL tube and spin at 5000 x g for 1 min.
- 665 8. If gel remains in the 0.5 mL tube, repeat step 7 and pool shredded gel
- 666 fractions by suspending each in 250  $\mu$ L soaking buffer using a wide-bore
- 667 P1000 tip.
- 668 9. Soak the gel pieces in 0.5 mL soaking buffer (TE + 150mM NaCl + 0.1%
- 669 Tween-20) overnight with agitation at 37°C.
- 670 10. Spin the tube at 5000 x g for 1 min.
- 671 11. Pipette as much of the soaking buffer as possible without transferring gel
- 672 pieces into a new tube.
- 673 12. Add an additional 0.5 mL soaking buffer and incubate 4 h at 37°C with
- 674 agitation.
- 675 13. Spin the tube at 5000 x g for 1 min.
- 676 14. Pipette as much of the soaking buffer as possible without transferring gel
- 677 pieces into the tube with the previous eluate.
- 678 15. Pass the remaining gel solution through a Costar Spin-X column using a cut
- 679 P1000 tip and pool with the previous eluate ( $V_f = 1$  mL)
- 680 16. Reduce the volume by half ( $V_f = 0.5$  mL) using vacuum dryer at 37°C.
- 681 17. Add 1  $\mu$ L GlycoBlue.
- 682 18. Add 2.5X volume (1.25 mL) 100% ethanol and vortex.
- 683 19. Centrifuge at >20,000 x g for 20 minutes at 4°C (see Note 23).
- 684 20. Carefully pipette off the supernatant and discard (see Note 24).
- 685 21. Add 750  $\mu$ L of 75% ethanol.
- 686 22. Mix by gentle inversion and quickly spin down.
- 687 23. Carefully pipette off the supernatant and discard (see Note 24).
- 688 24. Air-dry the RNA pellet (see Note 25).
- 689 25. Resuspend the pellet in the desired volume of 10 mM Tris-Cl, pH 8.0 (no
- 690 EDTA!).
- 691



## 692 4. Notes

- 693 1. All salt solutions should be prepared in ddH<sub>2</sub>O. Then add 0.1% (v/v) DEPC, stir  
694 overnight, and autoclave. Tris buffers instead need to be carefully prepared with  
695 DEPC-treated ddH<sub>2</sub>O.
- 696 2. All other solutions (detergents, DTT, sucrose, EDTA/EGTA, and Tris buffers) should  
697 be prepared in DEPC ddH<sub>2</sub>O in RNase free containers and filter sterilized.  
698 Glassware can be made RNase by filling with water, adding 0.1% (v/v) DEPC,  
699 incubating with agitation overnight, and autoclaving. Alternatively, glassware can  
700 be baked at 300 °C for 4 hours.
- 701 3. TRIzol LS or the Norgen Total RNA Purification Kit can be used to extract total  
702 RNA from the run-on reaction. Both options produce identical results. The Norgen  
703 kit is faster and less technically challenging to use, but more expensive. If TRIzol  
704 LS is used, Micro Bio-Spin™ RNase free P-30 Gel Columns are also needed to  
705 remove unincorporated biotin-NTPs as the biotin concentration will otherwise  
706 overwhelm the binding capacity of the streptavidin beads.
- 707 4. REV3 and REV5 sequences are reverse complements of the standard RA3/RA5  
708 adapter design used in the Illumina TruSeq small RNA library prep kit with added  
709 6XN UMIs and a final ligation-optimal fixed base. The oligos are blocked from  
710 additional ligation by an inverted dT/ddT group. This design results in sequencing  
711 of the 3' end of the nascent RNA at the beginning of read 1 using standard Illumina  
712 sequencing primers. Standard RA3/RA5 adapters (custom synthesized or from  
713 compatible library prep kits) can be substituted, but in this case paired end  
714 sequencing is necessary as the 3' end of the nascent RNA will be sequenced at  
715 the beginning of read 2.
- 716 5. Index sequences in RPI-n primers are standard 6 nt Illumina TruSeq indices. If  
717 multiplexing of more than 12 libraries is desired, additional indexed primers can be  
718 designed using additional TruSeq 6 nt index sequences. The index sequences  
719 must be inserted in the primer reverse complemented because the RPI-n primers  
720 are the reverse primers in the library PCR reaction.
- 721 6. If desired, specialized REV3 oligos can be designed to facilitate additional in-line  
722 barcoding to allow for the pooling of multiple samples after the 3' ligation, which  
723 simplifies downstream handling. We have had success with replacing the UMI  
724 sequence (rNrNrNrNNN) with known barcode sequences followed by the final fixed  
725 rU. These barcodes are then the first 6 sequenced nucleotides of Read 1 and can  
726 be used to computationally demultiplex samples.
- 727 7. The permeabilization buffer, cell wash buffer, freeze buffer, and bead  
728 washing/binding buffers can be made and filter-sterilized in advance without the  
729 DTT, SUPERase-In™ RNase Inhibitor, and Pierce™ protease inhibitor tablets.

- 730 DTT, SUPERase-In™ RNase Inhibitor, and protease inhibitor tablets can be added  
731 when buffers are needed. Store buffers at 4°C. Use DEPC treated glassware or  
732 RNase free plasticware.
- 733 8. The run-on reaction uses 4 biotin-NTPs. However, ATP and GTP can be  
734 substituted at equal concentration for Biotin-11-ATP and Biotin-11-GTP to reduce  
735 cost. Biotin-11-ATP and biotin-11-GTP are 10X as expensive as biotin-11-CTP and  
736 biotin-11-UTP. With two biotin-NTPs blocking elongation, each polymerase can be  
737 expected to extend ~5 nt or less which we find gives sufficient resolution for the  
738 vast majority of applications. For low cell number experiments, increase the  
739 concentration of the biotin-NTPs to 500  $\mu$ M. Biotin-NTP incorporation efficiency is  
740 ~60% with the concentration in the 2XROMM as written, which is sufficient for  
741 experiments using  $10^6$  cells or greater, but increasing the concentration improves  
742 incorporation to ~77% (data not shown).
  - 743 9. Use a centrifuge with a swinging bucket rotor for all centrifuge steps during cell  
744 permeabilization. Using a fixed angle rotor will shear cells, releasing a smear of  
745 white chromatin.
  - 746 10. Centrifuge speed is cell size dependent. We typically centrifuge HeLa at 800 x g  
747 and Drosophila at 1,000 x g.
  - 748 11. When resuspending cells during permeabilization after centrifugation steps, first  
749 gently resuspend the cell pellet with 1 mL solution with a wide-bore P1000 tip.  
750 Then add the remaining volume (usually 9 mL) and mix by gentle inversion.
  - 751 12. If your cell type is not permeabilized under these conditions, add Triton X-100 to  
752 0.1-0.2%.
  - 753 13. When processing multiple samples, if counting will cause the cells to sit on ice for  
754 greater than 10 min, reserve 10  $\mu$ L for counting, aliquot cells in 100  $\mu$ L aliquots,  
755 and snap freeze. Count the cells and then adjust the concentration with freeze  
756 buffer after thawing and prior to the run-on.
  - 757 14. In order to robustly normalize between conditions where a dramatic change in  
758 global transcription levels are expected, we add a fixed number of cells of a  
759 different species to a fixed number of experimental cells at the permeabilization  
760 step. Reads can be mapped to a combined genome, and the number of spike-in  
761 mapped reads can then be used as a scaling factor. These cells should be  
762 permeabilized prior to the experiment, aliquoted, and added to 1-2% by cell  
763 number after permeabilization and counting, either just prior to freezing or just prior  
764 to the run-on reaction. We frequently use Drosophila S2 cells to normalize human  
765 cell experiments and vice versa.

- 766 15. Eppendorf tubes can be spun in a fixed angle rotor, but we continue to use a  
767 swinging bucket rotor so that cells collect at bottom of tube (this tends to decrease  
768 cell loss).
- 769 16. We have had success performing this protocol with as few as 50k primary human  
770 cells. In general, we find that the quality of libraries will increase until  $\sim 1 \times 10^6$  cells  
771 per run-on but using more cells than this offers little benefit. This will also depend  
772 on how transcriptionally active a given cell type is and genome size.
- 773 17. Permeabilized cells are stable indefinitely at  $-80^\circ\text{C}$  (Chu et al., 2018).
- 774 18. C1 Streptavidin beads are preferred compared to M280 beads because they have  
775 higher binding capacity and use a negatively charged matrix. This significantly  
776 reduces carryover of non-biotinylated RNAs including adapter dimers.
- 777 19. Be careful not to disturb beads when removing buffers from tubes. Open tube caps  
778 prior to placing them on the magnet stand, as opening on the magnet stand can  
779 disturb the liquid. Check pipette tip against a white background before discarding  
780 liquid to ensure beads are not present.
- 781 20. Always quickly spin samples down using a picofuge to remove liquid from tube  
782 caps.
- 783 21. When preparing the 2XROMM, first add all components other than Sarkosyl and  
784 mix by vortexing on high for  $>10$  sec. Collect the solution with a quick spin, add  
785 Sarkosyl, and mix thoroughly by pipetting carefully to avoid bubbles. If you leave  
786 the 2XROMM on ice, a precipitate can form. Before use, check if this has occurred.  
787 The precipitate can be re-dissolved by heating at  $37^\circ\text{C}$  for  $\sim 5$  min and pipette  
788 mixing.
- 789 22. If the protocol needs to be performed over two days, the ethanol precipitation in 3.4  
790 is the safest overnight stopping point. After step 17 of 3.4.1 or step 24 of section  
791 3.4.2, samples can be stored at  $-80^\circ\text{C}$ . The protocol can also be stopped after the  
792 ethanol precipitation following TRIzol extractions, but samples must be stored for  
793 at most one night at  $4^\circ\text{C}$  because at  $-20^\circ\text{C}$  precipitation of guanidinium salts can  
794 occur and interfere with enzymatic reactions. Alternatively, the RNA pellet can be  
795 stored at  $-80^\circ\text{C}$  after the precipitation and removal of the supernatant.
- 796 23. A blue pellet should be visible at the bottom of tube. The pellet can be difficult to  
797 see but should be visible. It may appear spread out. If a pellet is not visible, vortex  
798 well and repeat spin.
- 799 24. When removing the supernatant before the 70% ethanol wash be careful not to  
800 disturb the pellet. Approximately  $30\text{--}50\mu\text{L}$  of ethanol can be left in the tube to avoid  
801 disturbing the pellet prior to adding the 70% ethanol wash. This procedure can also  
802 be used after the 70% ethanol wash, but then remove the final  $30\text{--}50\mu\text{L}$  using a  
803 P200 tip after a quick spin in a picofuge.

- 804 25. Air dry the RNA pellet by leaving tubes open in fume hood to prevent  
805 contamination. This will take ~3-10 min depending on how much ethanol is left in  
806 the tube. Do not to let the RNA pellet dry completely as this will greatly decrease its  
807 solubility.
- 808 26. When pipetting chloroform, always pipette twice because the first draw always  
809 leaks.
- 810 27. When transferring the aqueous phase of TRIzol extractions to a new tube, tilt the  
811 tube to a 45° angle and carefully remove only the clear liquid. Avoid contamination  
812 by the pink organic phase or white interphase.
- 813 28. The concentration of RNA adapters in the ligation steps (1  $\mu$ L 10  $\mu$ M) is optimal for  
814 approximately  $10^6$  mammalian cells. For lower cell numbers, the adapter  
815 concentration must be diluted to limit dimer formation. We dilute linearly with cell  
816 concentration relative to this established concentration, i.e. 1  $\mu$ L 5  $\mu$ M for  $5 \times 10^5$   
817 cells, 1  $\mu$ L 2.5  $\mu$ M for  $2.5 \times 10^5$  cells, etc.
- 818 29. Pipette slowly because 50% PEG8000 is very viscous. Heating 50% PEG8000  
819 makes it easier to pipette. Pipette the ligation mix until it is homogenous before  
820 use.
- 821 30. When preparing enzymatic reaction mixtures that contain SUPERase-In RNase  
822 Inhibitor, a fixed volume (1  $\mu$ L) SUPERase-In can be added to the entire master  
823 mix regardless of number of reactions to decrease cost. Bring the remainder of the  
824 master mix up to the required volume with DEPC H<sub>2</sub>O. Murine RNase inhibitor can  
825 also be substituted to limit costs for all steps after the run-on. SUPERase-In is  
826 recommended prior to the run-on as it inhibits T1 RNase.
- 827 31. For each washing step gently invert tubes 10–15X, quickly spin down with a  
828 picofuge, open caps, and then place on the magnet stand. Wait 1-2 minutes and  
829 pipette the supernatant off without disturbing the beads. If there are bubbles in the  
830 tube carefully pipette them off first and then remove supernatant. Beware that  
831 bubbles may dislodge beads from the side of the tube. After removing the bulk of  
832 the liquid, collect remaining liquid with a quick spin in a picofuge, place the tube  
833 back on the magnet stand, and carefully remove remaining liquid by pipetting.
- 834 32. Transferring beads to a new tube after the binding incubation—during the high salt  
835 wash step—helps limit adapter dimer formation. After resuspending the beads in  
836 High Salt buffer, quickly spin down with a picofuge, resuspend beads by gently  
837 pipetting, and carefully transfer to a new tube. Pipette slowly to avoid bead loss!  
838 Place this new tube on the magnet stand and proceed with the washing protocol.
- 839 33. Do not allow streptavidin beads to dry completely, as this can lead to clumping and  
840 make full resuspension impossible. When processing multiple samples, remove  
841 liquid from the previous wash or enzymatic step from the first sample and

- 842 immediately resuspend those beads in the next solution, then repeat this process  
843 for additional samples.
- 844 34. On-bead reaction volumes assume that 1  $\mu\text{L}$  of liquid remains on the beads.  
845 35. Mix on-bead reactions by gently flicking the tubes every 10 minutes.  
846 36. We have also successfully used Cap-Clip™ Acid Pyrophosphatase (CELLTREAT)  
847 instead of RppH. Cap-Clip has lower buffer pH which may alleviate base hydrolysis  
848 of RNA that could occur in the pH 8.0 ThermoPol buffer. However, this is not a  
849 major concern except for in the most sensitive of applications.
- 850 37. Reverse transcription can also be performed on-bead, but we find that this  
851 significantly reduces library yield while increasing adapter dimer. For this reason, it  
852 is not recommended except in cases where material is abundant ( $10^7$  cells) and  
853 speed is paramount. To do this, follow steps 1–2 in section 3.12, then follow  
854 section 3.13, but resuspend the beads instead of the RNA pellet in RT  
855 resuspension mix. After RT, elute cDNA by heating the bead mixture to 95°C,  
856 quickly place tubes on a magnet stand, and remove and save supernatant.  
857 Resuspend beads in 20  $\mu\text{L}$  ddH<sub>2</sub>O and repeat the process for a final volume of 40  
858  $\mu\text{L}$ . Proceed with PreCR but use 20  $\mu\text{L}$  less ddH<sub>2</sub>O (13.5  $\mu\text{L}$ ) in the PreCR mix and  
859 use the entire 40  $\mu\text{L}$  eluate instead of the 20  $\mu\text{L}$  RT mix.
- 860 38. PreCR is optional if full scale amplification will be performed within 2 days. Longer  
861 storage of single-stranded cDNA libraries can lead to loss of library material. If you  
862 are skipping PreCR, simply store the 20  $\mu\text{L}$  RT reaction at -20°C overnight and  
863 perform test amplification the next day.
- 864 39. Because this protocol uses molecular barcodes (UMIs) which facilitate robust  
865 computational PCR deduplication, it is less important to precisely determine the  
866 optimal cycle number. We recommend performing test amplification the first time  
867 you perform this protocol with a given amount of material from a given cell line to  
868 determine the optimal cycle number. For future experiments where the material  
869 and cell number are constant, test amplification can be skipped. Adjust the volume  
870 of the full-scale PCR to 100  $\mu\text{L}$  total volume (accounting for the fact that the written  
871 protocol assumes loss due to test amplification). Test amplification can be  
872 performed either by PCR of a dilution curve and PAGE analysis or qPCR.
- 873 40. Do not attempt to scale down the PreCR or full-scale amplification steps to save  
874 PCR reagents. If RT reaction mixture exceeds 20% of the PCR reaction volume,  
875 significant inhibition of PCR will occur and lead to dramatically lower final library  
876 yield.
- 877 41. Taking 7.7  $\mu\text{L}$  of the 100  $\mu\text{L}$  PreCR reaction leaves 92.3  $\mu\text{L}$  for full-scale  
878 amplification. 25% of material in the first dilution is lost to make the next serial 4-  
879 fold dilution (2 of 8  $\mu\text{L}$ ). Because  $(7.7 * 0.75) / 92.3 \approx 1/16$ , this first dilution is

- 880 equivalent to the number of test amplification cycles less 4. If starting from the RT  
881 reaction, the volume has been adjusted for 5-fold lower starting volume.
- 882 42. Additional cycles can vary by cell type. For HeLa, we typically perform 14  
883 additional cycles (19 total cycles), which simulates 15 full-scale amplification  
884 cycles. For low input libraries (50k-250k mammalian cells), we typically perform 20  
885 additional cycles (23 cycles total), which simulates 21 full-scale amplification  
886 cycles.
- 887 43. If PreCR was skipped, use an annealing temperature of 56°C for the first 5 cycles  
888 of test amplification and the full-scale amplification.
- 889 44. Desired amplification characteristics include a sufficient amount of product (smear  
890 starting ~150 bp), no evidence of overamplification, and ~50% primer exhaustion  
891 (Mahat et al., 2016). The adaptor dimer product is 132 bp, and the smear will start  
892 15–20 bp above this band. RNA degradation will lead to shorter library products.
- 893 45. AMPure XP beads will work, as will any commercially available or homemade  
894 SPRI bead cleanup reagent based on PEG precipitation. Be sure to allow beads to  
895 reach room temperature, or excess primers will also precipitate.
- 896 46. Due to advances in streptavidin bead technology and titration of adapters  
897 presented in this protocol, PAGE purification is rarely necessary. We prefer to  
898 sequence libraries that are 0%–25% adapter dimer rather than risk size bias  
899 associated with gel purification. Only perform PAGE purification if absolutely  
900 necessary. If needed, multiple libraries can be pooled by molarity as determined by  
901 bioanalyzer and extracted from the same gel lane to minimize size bias.  
902

## 903 **5. References**

- 904 Bentley DL, Groudine M. 1986. A block to elongation is largely responsible for decreased  
905 transcription of c-myc in differentiated HL60 cells. *Nature* **321**:702–70.  
906 doi:10.1038/321702a0
- 907 Birse CE, Lee BA, Hansen K, Proudfoot NJ. 1997. Transcriptional termination signals for RNA  
908 polymerase II in fission yeast. *EMBO J* **16**:3633–3643. doi:10.1093/emboj/16.12.3633
- 909 Blumberg A, Zhao Y, Huang Y-F, Dukler N, Rice EJ, Krumholz K, Danko CG, Siepel A. 2019.  
910 Characterizing RNA stability genome-wide through combined analysis of PRO-seq and  
911 RNA-seq data. *bioRxiv*. doi:10.1101/690644
- 912 Chu T, Rice EJ, Booth GT, Salamanca HH, Wang Z, Core LJ, Longo SL, Corona RJ, Chin LS,  
913 Lis JT, Kwak H, Danko CG. 2018. Chromatin run-on and sequencing maps the  
914 transcriptional regulatory landscape of glioblastoma multiforme. *Nat Genet* **50**:1553–1564.  
915 doi:10.1038/s41588-018-0244-3
- 916 Churchman LS, Weissman JS. 2011. Nascent transcript sequencing visualizes transcription at  
917 nucleotide resolution. *Nature* **469**:368–373. doi:10.1038/nature09652
- 918 Core LJ, Martins AL, Danko CG, Waters CT, Siepel A, Lis JT. 2014. Analysis of nascent RNA  
919 identifies a unified architecture of initiation regions at mammalian promoters and  
920 enhancers. *Nat Genet* **46**:1311–20. doi:10.1038/ng.3142
- 921 Core LJ, Waterfall JJ, Lis JT. 2008. Nascent RNA sequencing reveals widespread pausing and  
922 divergent initiation at human promoters. *Science* **322**:1845–1848.  
923 doi:10.1126/science.1162228
- 924 Danko CG, Hah N, Luo X, Martins AL, Core L, Lis JT, Siepel A, Kraus WL. 2013. Signaling  
925 Pathways Differentially Affect RNA Polymerase II Initiation, Pausing, and Elongation Rate  
926 in Cells. *Mol Cell* **50**:212–222. doi:10.1016/j.molcel.2013.02.015
- 927 Danko CG, Hyland SL, Core LJ, Martins AL, Waters CT, Lee HW, Cheung VG, Kraus WL, Lis  
928 JT, Siepel A. 2015. Identification of active transcriptional regulatory elements from GRO-  
929 seq data. *Nat Methods* **12**:433–438. doi:doi:10.1038/nmeth.3329
- 930 Derman E, Krauter K, Walling L, Weinberger C, Ray M, Darnell JE. 1981. Transcriptional  
931 control in the production of liver-specific mRNAs. *Cell* **23**:731–739. doi:10.1016/0092-  
932 8674(81)90436-0
- 933 Duarte FM, Fuda NJ, Mahat DB, Core LJ, Guertin MJ, Lis JT. 2016. Transcription factors GAF  
934 and HSF act at distinct regulatory steps to modulate stress-induced gene activation.  
935 *Genes Dev* **30**:1731–1746. doi:10.1101/gad.284430.116
- 936 García-Martínez J, Aranda A, Pérez-Ortín JE. 2004. Genomic run-on evaluates transcription  
937 rates for all yeast genes and identifies gene regulatory mechanisms. *Mol Cell* **15**:303–313.  
938 doi:10.1016/j.molcel.2004.06.004
- 939 Gariglio P, Bellard M, Chambon P. 1981. Clustering of RNA polymerase B molecules in the 5'  
940 moiety of the adult  $\beta$ -globin gene of hen erythrocytes. *Nucleic Acids Res* **9**:2589–2598.

- 941 doi:10.1093/nar/9.11.2589
- 942 Hirayoshi K, Lis JT. 1999. Nuclear run-on assays: Assessing transcription by measuring  
943 density of engaged RNA polymerases. *Methods Enzymol* **304**:351–362.  
944 doi:10.1016/S0076-6879(99)04021-5
- 945 Jonkers I, Kwak H, Lis JT. 2014. Genome-wide dynamics of Pol II elongation and its interplay  
946 with promoter proximal pausing, chromatin, and exons. *Elife* **3**:1–25.  
947 doi:10.7554/elife.02407
- 948 Kruesi WS, Core LJ, Waters CT, Lis JT, Meyer BJ. 2013. Condensin controls recruitment of  
949 RNA polymerase II to achieve nematode X-chromosome dosage compensation. *Elife* **2**.  
950 doi:10.7554/eLife.00808
- 951 Kwak H. 2013. Dissection Of The Precise Mechanisms Of Rna Polymerase Ii Pausing And  
952 Elongation Using Nascent Transcript Analysis.
- 953 Kwak H, Fuda NJ, Core LJ, Lis JT. 2013. Precise maps of RNA polymerase reveal how  
954 promoters direct initiation and pausing. *Science (80- )* **339**:950–953.  
955 doi:10.1126/science.1229386
- 956 Mahat DB, Kwak H, Booth GT, Jonkers IH, Danko CG, Patel RK, Waters CT, Munson K, Core  
957 LJ, Lis JT. 2016. Base-pair-resolution genome-wide mapping of active RNA polymerases  
958 using precision nuclear run-on (PRO-seq). *Nat Protoc* **11**:1455–1476.  
959 doi:10.1038/nprot.2016.086
- 960 Mahat DB., Salamanca HH, Duarte FM, Danko CG, Lis JT. 2016. Mammalian Heat Shock  
961 Response and Mechanisms Underlying Its Genome-wide Transcriptional Regulation. *Mol*  
962 *Cell* **62**:63–78. doi:10.1016/j.molcel.2016.02.025
- 963 O'Brien T, Lis JT. 1993. Rapid changes in Drosophila transcription after an instantaneous heat  
964 shock. *Mol Cell Biol* **13**:3456–3463. doi:10.1128/mcb.13.6.3456
- 965 Powell DJ, Friedman JM, Oulette AJ, Krauter KS, Darnell JE. 1984. Transcriptional and post-  
966 transcriptional control of specific messenger RNAs in adult and embryonic liver. *J Mol Biol*  
967 **179**:21–35. doi:10.1016/0022-2836(84)90304-8
- 968 Rougvie AE, Lis JT. 1988. The RNA polymerase II molecule at the 5' end of the uninduced  
969 hsp70 gene of *D. melanogaster* is transcriptionally engaged. *Cell* **54**:795–804.  
970 doi:10.1016/S0092-8674(88)91087-2
- 971 Schwalb B, Michel M, Zacher B, Hauf KF, Demel C, Tresch A, Gagneur J, Cramer P. 2016. TT-  
972 seq maps the human transient transcriptome. *Science* **352**:1225–1228.  
973 doi:10.1126/science.aad9841
- 974 Vihervaara A, Mahat DB, Guertin MJ, Chu T, Danko CG, Lis JT, Sistonen L. 2017.  
975 Transcriptional response to stress is pre-wired by promoter and enhancer architecture.  
976 *Nat Commun* **8**:255. doi:10.1038/s41467-017-00151-0
- 977 Wang Z, Chu T, Choate LA, Danko CG. 2019. Identification of regulatory elements from  
978 nascent transcription using dREG. *Genome Res* **29**:293–303. doi:10.1101/gr.238279.118



- 979 Weiss SB, Gladstone L. 1959. A Mammalian System for The Incorporation of Cytidine  
980 Triphosphate into Ribonucleic Acid. *J Am Chem Soc* **81**:4118–4119.  
981 doi:10.1021/ja01524a087
- 982 Wissink EM, Vihervaara A, Tippens ND, Lis JT. 2019. Nascent RNA analyses: tracking  
983 transcription and its regulation. *Nat Rev Genet* **20**:705–723. doi:10.1038/s41576-019-  
984 0159-6  
985

986 **Table 1. Oligonucleotides**

| Name   | Sequence                                                         | Purification    |
|--------|------------------------------------------------------------------|-----------------|
| REV3   | /5Phos/rUrNrNrNrNrNNGATCGTCGGACTGTAGAACTCTGAAC/3InvdT/           | RNase-free HPLC |
| REV5   | /5InvddT/CCTTGGCACCCGAGAATTCCANrNrNrNrNrNrC                      | RNase-free HPLC |
| RP1    | AATGATACGGCGACCACCGAGATCTACACGTTTACAGTTCTACAGTCCGA               | PAGE            |
| RPI-1  | CAAGCAGAAGACGGCATAACGAGATCGTGATGTGACTGGAGTTCCTTGGCACCCGAGAATTCCA | PAGE            |
| RPI-2  | CAAGCAGAAGACGGCATAACGAGATAGATCGGTGACTGGAGTTCCTTGGCACCCGAGAATTCCA | PAGE            |
| RPI-3  | CAAGCAGAAGACGGCATAACGAGATGCTAAGTGACTGGAGTTCCTTGGCACCCGAGAATTCCA  | PAGE            |
| RPI-4  | CAAGCAGAAGACGGCATAACGAGATGGTCAAGTGACTGGAGTTCCTTGGCACCCGAGAATTCCA | PAGE            |
| RPI-5  | CAAGCAGAAGACGGCATAACGAGATCACTGTGTGACTGGAGTTCCTTGGCACCCGAGAATTCCA | PAGE            |
| RPI-6  | CAAGCAGAAGACGGCATAACGAGATATTGGCGTGACTGGAGTTCCTTGGCACCCGAGAATTCCA | PAGE            |
| RPI-7  | CAAGCAGAAGACGGCATAACGAGATGATCTGGTGACTGGAGTTCCTTGGCACCCGAGAATTCCA | PAGE            |
| RPI-8  | CAAGCAGAAGACGGCATAACGAGATCAAGTGACTGGAGTTCCTTGGCACCCGAGAATTCCA    | PAGE            |
| RPI-9  | CAAGCAGAAGACGGCATAACGAGATCTGATCGTGACTGGAGTTCCTTGGCACCCGAGAATTCCA | PAGE            |
| RPI-10 | CAAGCAGAAGACGGCATAACGAGATAAGCTAGTGACTGGAGTTCCTTGGCACCCGAGAATTCCA | PAGE            |
| RPI-11 | CAAGCAGAAGACGGCATAACGAGATGTAGCCGTGACTGGAGTTCCTTGGCACCCGAGAATTCCA | PAGE            |
| RPI-12 | CAAGCAGAAGACGGCATAACGAGATTACAAGGTGACTGGAGTTCCTTGGCACCCGAGAATTCCA | PAGE            |

987
